# Supplementary material for: Novel saccharide–pyridine based gelators: selective gelation and diversity in superstructures
Source: Royal Society of Chemistry journal article supplement (doi:10.1039/b821126d), 2009-01-01

## Novel Saccharide-Pyridine based gelators: selective gelation and diversity in superstructures

K. Karthik Kumar<sup>a</sup>, M. Elango<sup>b</sup>, V. Subramanian<sup>b\*</sup>, T. Mohan Das<sup>a\*</sup>

**Table S1:** Chemical shifts (ppm) and coupling constants (Hz) of the anomeric proton (Ano-H) and N-glycosylamine proton (Gly-NH). \* Ano-H peak overlapped with the saccharide-OH groups.

| Compound no | $\delta$ . (Ano-H),<br>$^3J_{H_1, H_2}$ | $\delta$ . (Gly-NH),<br>$^3J_{H_1, H_2}$ | Yield(%) |
|-------------|-----------------------------------------|------------------------------------------|----------|
| 7           | 5.09 (t), 9.3 Hz                        | 6.46 (d), 7.8 Hz                         | 69       |
| 8           | 5.04 (t), 8.7 Hz                        | 7.03 (d), 9.3 Hz                         | 65       |
| 9           | 6.52 (d), 9 Hz                          | 6.4 (d), 9 Hz                            | 48       |
| 10          | 6.41 (d), 8.7 Hz                        | 7.28 (d), 9 Hz                           | 61       |
| 11          | 5.01 (t), 8.7 Hz                        | 6.49 (d), 8.7 Hz                         | 69       |
| 12          | 6.96 (d), 6 Hz                          | 5.25 (d), 6 Hz                           | 23       |
| 13          | 4.71 (d), ...*                          | 5.86 (d), 6.6 Hz                         | 71       |
| 14          | 4.64 (t), 7.5 Hz                        | 5.86 (d), 7.2 Hz                         | 64       |
| 15          | 6.96 (d), 6 Hz                          | 6.82 (d), 6 Hz                           | 60       |

**Figure S2:** FT-IR spectra of compound **11** (a), 1,2-dichlorobenzene; (b), gel phase (1,2-dichlorobenzene) and (c), solid phase.

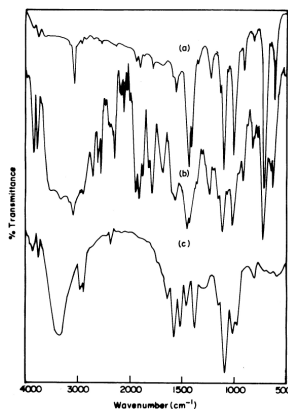

**Scheme S3:** Different regions in the chosen molecules which have the tendency to interact with other molecules.

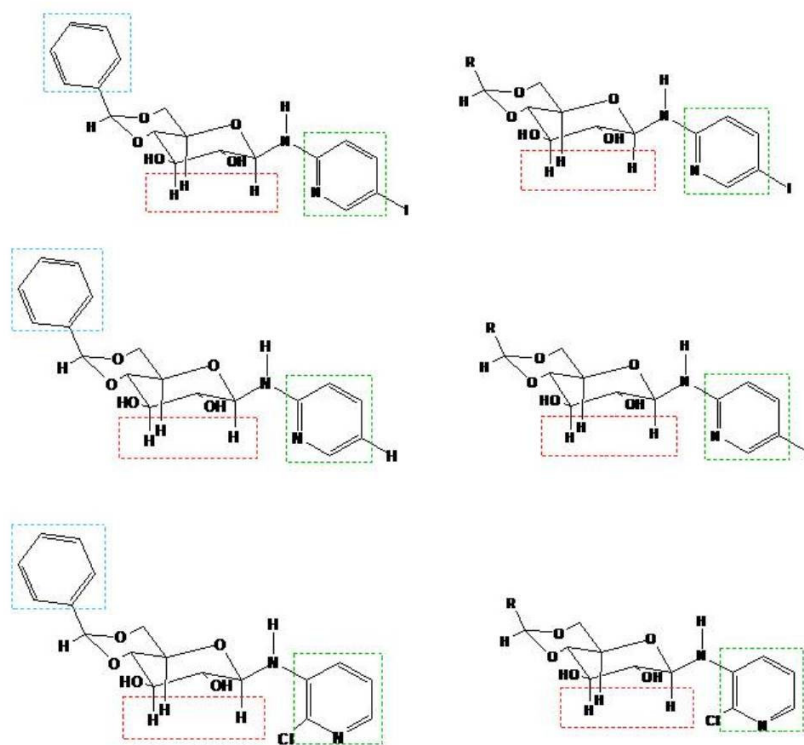

**FIGURE S4:** Optimized geometries of all the molecules obtained from B3LYP calculation using 6-31G\* and MIDIX basis sets

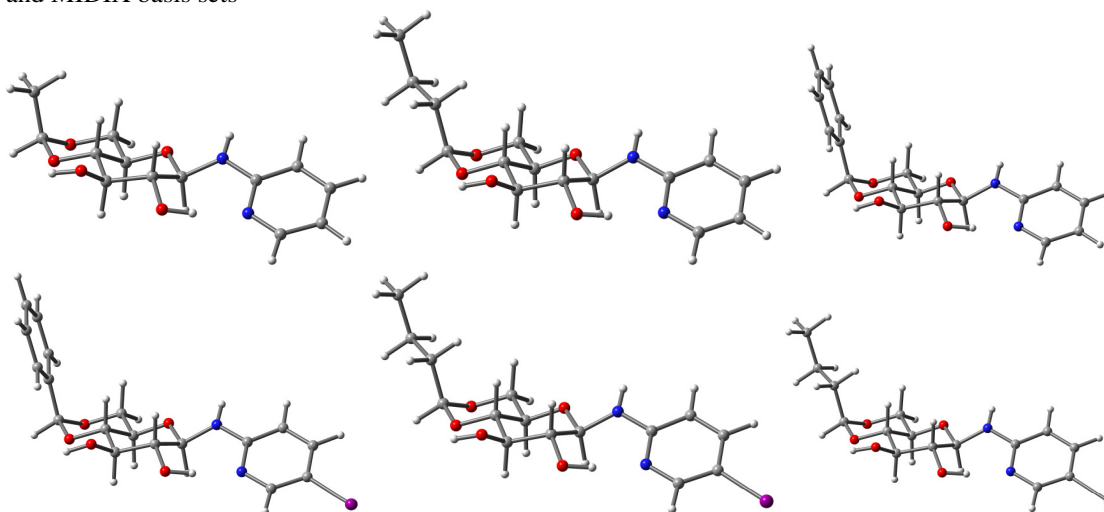

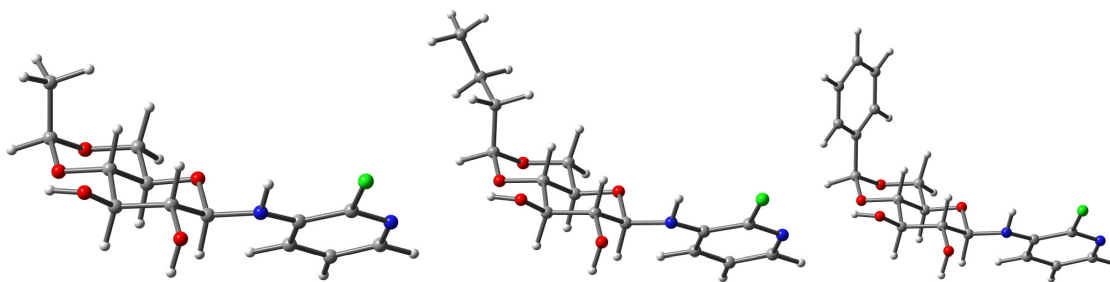

**Table S5:** Stabilization energy of various proposed interactions obtained from MP2 level of calculation using 6-31G\* and MIDIX basis sets.

| Species                   | Orientation        | BSSE uncorrected SE (kcal/mol) | BSSE corrected SE (kcal/mol) |
|---------------------------|--------------------|--------------------------------|------------------------------|
| Py-NH <sub>2</sub> -H     | Parallel-displaced | 6.7                            | 2.1                          |
| Py-Cl-NH <sub>2</sub>     | Parallel-displaced | 9.3                            | 4.3                          |
| Py-NH <sub>2</sub> -I     | Parallel-displaced | 12.8                           | 7.2                          |
| Bz-Bz                     | Parallel           | 2.1                            | -0.1                         |
| Bz-Bz                     | Parallel-displaced | 3.2                            | 0.1                          |
| Sug-Py-NH <sub>2</sub> -H | CH- $\pi$          | 7.6                            | 2.2                          |
| Sug-Py-Cl-NH <sub>2</sub> | CH- $\pi$          | 7.1                            | 1.9                          |
| Sug-Py-NH <sub>2</sub> -I | CH- $\pi$          | 8.3                            | 3.1                          |
| Sug-Bz                    | CH- $\pi$          | 5.1                            | 1.9                          |

**FIGURE S6:** Molecular electrostatic potential maps of all the molecules obtained from B3LYP calculation using 6-31G\* and MIDIX basis sets. The given electrostatic potential maps are  $\pm 0.04$  au isosurface value.

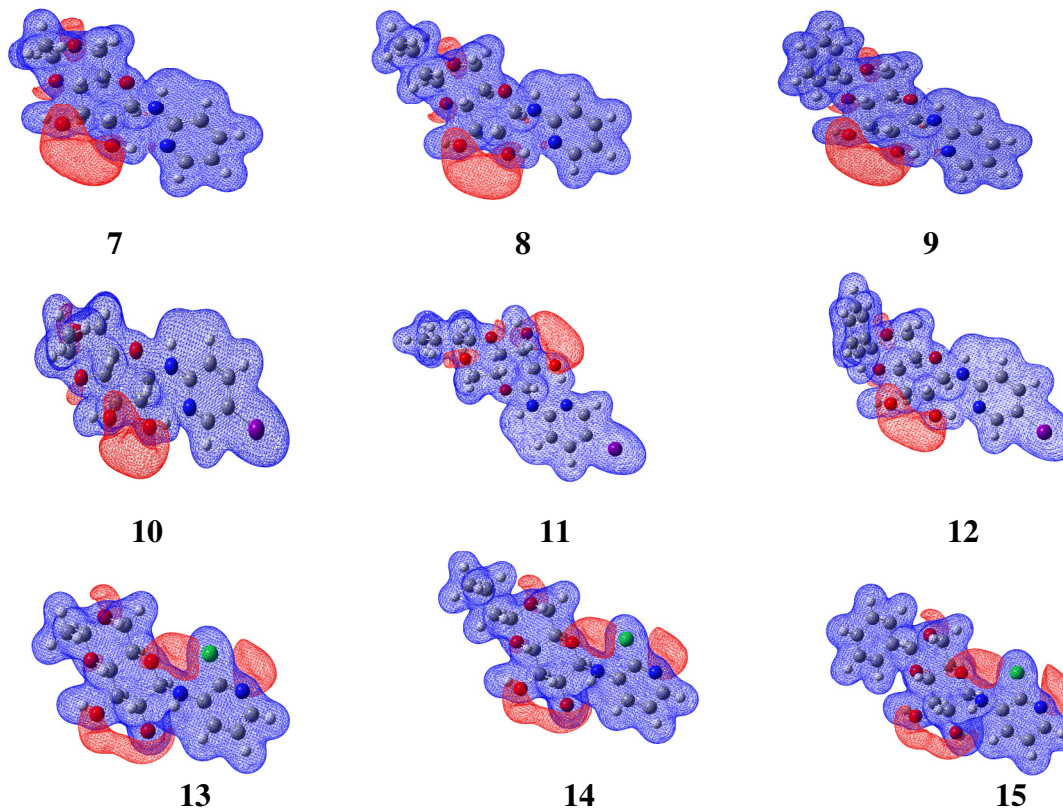

Supplement: b821126d.pdf [file b821126d.pdf]
